# Supplementary material for: Surveillance Web System and Mouthwash-Saliva qPCR for Labor Ambulatory SARS-CoV-2 Detection and Prevention
Source: MDPI journal article supplement (doi:10.3390/ijerph19031271), 2022-01-24
Supplement: s1 [file s1]

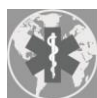

## Supplement S2. Automatic decision-making algorithms applied to a web-platform surveillance system: An occupational-academic cluster case

### INPUTS { Web-Platform and App-SMARTER-Co }

// **Category 1.** Initializing survey and monitoring of the population at cluster- $i$  and time- $j$  //

$P_n$  ← Main cluster: Ambulatory population (**ap**) at workspace  
 $Am_c$  ← Subcluster- $n$  (Subc): **ap** with functional relationships (external or internal at workspace)  
 $P_{pt}$  ← Operative team 1: Certified Physician(s) ( $P_{pt-1}$ ) and laboratory technician ( $P_{pt-2}$ )  
 $P_{ht}$  ← Operative team 2: Health commission  
 $M_t$  ← Operative team 3: Mitigation and sampling crew  
 $t$  ← Implementation time ( $t_0 \dots t_j$ ) of the Surveillance System [Continuous to End period]  
 $t_0$  ← Start surveillance  
 $t_1$  ← Time at qPCR results  
 $t_j$  ← Daily monitoring ( $t_{0+1} \dots t_j$ )  
 $S_u$  ← Workspace- $i$  with  $n$ -spatial units defining a subcluster **ap**.  
 $SA$  ← Survey assistance  
 $DSm$  ← Daily self-monitoring from time- $0+1$  to time- $j$   
 $CE$  ← Clinical and epidemiological data at survey [90 variables] and monitoring [25 variables]

// **Category 2.** Clinical data of individual- $i$  ( $i = 1 \dots n$  individuals at  $P_n$  //

$M_s$  ← Main putative COVID-19 symptoms at individual- $i$  [Fever, Dry cough and Headache]  
 $S_s$  ← Secondary putative COVID-19 symptoms at individual- $i$  [Body Pain, Throat Pain, Rhinorrhea, Conjunctivitis, Chest pain, Diarrhea, Chills, Nausea, Vomiting or Fatigue]  
 $Cd$  ← Chronic diseases [Hypertension, Diabetes, Obesity, COPD, Smoking, Cancer, HIV, Asthma, Cardiovascular Diseases, Renal or Hepatic Insufficiency & Immunosuppressive]  
 $Am$  ← Ambulatory individual- $i$  with putative COVID-19 symptoms ( $M_s$  and/or  $S_s$ )  
 $P_{os}$  ← Ambulatory individual- $i$  positive to SARS-CoV-2  
 $AA$  ← Anosmia or/and Ageusia at individual- $i$   
 $Ag$  ← Age of individual- $i$  [3 to  $n$ -years old]  
 $Re$  ← RT-PCR testing result of individual- $i$  using ambulatory self-collected mouthwash-saliva procedure ["ready" or "in progress"] (Figure 1).  
 $qPCR$  ← SARS-CoV-2 in-house detection protocol with RT-qPCR (Supplementary Material 1).

// **Category 3.** Clinical-Epidemiological and Epidemiological data of individual- $i$  ( $i=1 \dots n$  individuals at  $P_n$  //

$C_{pos}$  ← Individual- $i$  in contact with a SARS-CoV-2 positive(s)  
 $S_{subc}$  ←  $n$ -Spatial units with **ap** at risk [Building, floor, division, family house, other]  
 $Occ$  ← Occupational **ap** at risk [Student, teacher, public relationships, driver, gardener, etc.,]  
 $Cur$  ← Classroom or laboratory activity of individual- $i$ ?  
 $Tt$  ← Transportation type risk [Low=private, Moderate=other or High=public]  
 $Z_{risk}$  ← Risk associated to the living area of an individual- $i$  [Low, Moderate or High]  
 $Sc_{risk}$  ← Subcluster **ap** risk [Low, Moderate or High]  
 $Mit$  ← Mitigation protocol [yes or no]  
 $Ws$  ← Weighted sampling base on risk criteria [selected or no-selected]

### OUTPUTS { Algorithms 1-9 } (Figure 4)

// **Type 1.** Alert risk notification to user through:

SMARTER-Co → WWW platform → SMARTER-Co { $t_0$ ; SMARTER-Co →  $P_n$ } //

Upon **low**, **moderate** or **high Risk**:

**Confinement**: "No required but daily monitoring suggested", "Preventive confining and daily monitoring", "Mandatory confinement and daily monitoring" or "Quarantine confining and daily monitoring mandatory"

**Surveillance** "Ambulatory" or "Clinical"

**Testing** = "You were selected for self-collecting mouthwash-saliva specimen for SARS-CoV-2 detection. Please after sampling, start your self-monitoring"; or  
 "You are not a COVID-19 suspect. Please star daily self-monitoring for early warning"

**Notification<sub>1</sub> / SMARTER-Co**: Based on risk at survey and daily monitoring.

// Type 2. Alert communication - WWW-Platform notify laboratory results to Operative team 1 and 2  
 WWW-Platform → SMS / Dashboard {  $t_1$ ; **WWW-Platform / SMS**  $P_{pt-1} \rightarrow P_{pt} \& P_{ht}$  }  
 //

**Notification<sub>2</sub> / SMS, Dashboard:** Based on testing results from  $P_{pt-1} \rightarrow P_{pt} \& P_{ht}$ .

// Type 3. Alert communication - Operative team 2 notify testing results to  $P_n$   
 WWW-Platform → SMS {  $t_1$ ; **SMS /  $P_{pt} \& P_{ht} \rightarrow P_n$**  } //

**Notification<sub>3.1</sub> / SMS:** Based on testing results from  $P_{pt} \& P_{ht} \rightarrow P_n$

**qPCR Positive** = “You are positive to SARS-CoV-2. Quarantine confining and Daily monitoring mandatory. Notify close contacts from last 5-days” or  
**Negative** = “You are negative to SARS-CoV-2. Continue daily monitoring”

**Notification<sub>3.2</sub> / SMS:** Based on positive results prompt for clinical monitoring from  $P_{pt} \rightarrow P_{os}$

// Type 4. Alert mitigation - Operative team 2 notify actions to Operative team 3  
 WWW-Platform → SMS {  $t_1$ ; **SMS /  $P_{ht} \rightarrow M_t$**  } //

**Notification<sub>4</sub> / SMS:** Based on positive individual(s) prompt for mitigation protocol from  $P_{ht} \rightarrow M_t$

// Type 5. Alert communication - Positive individual notify to contacts at subcluster(s)-n {  $t_1$ ;  $P_{os} \rightarrow Am_c$  } //  
 SMS, @mail, WSP, etc. {  $t_1$ ; **social networks (SN) /  $P_{os} \rightarrow Am_c$**  } //

**Notification<sub>5</sub> / SN:** Based on SMS of positivity and resending to ambulatory closed-contacts prompting for immediate SMARTER-Co downloading and surveying, from  $P_{os} \rightarrow Am_c$

// Type 6, 7 and 8. Patient appointment for SARS-CoV-2 re-testing after mandatory quarantine period  
 WWW-Platform → SMS {  $t_1$ ; **SMS /  $P_{pt} \& P_{ht} \rightarrow P_{os}$**  } //

**Notification<sub>6</sub> / SMS:** Based on clinical monitoring by patient, and surveillance by Operative team 1 prompt for re-testing at specific date and time appointed to laboratory- $i$ .  
 From  $P_{pt} \& P_{ht} \rightarrow P_{os}$

**Notification<sub>7</sub> / SMS:** Positive = “You are still positive to SARS-CoV-2. Continue quarantine confining and Daily monitoring mandatory. Wait next appointment”  
 From  $P_{pt} \& P_{ht} \rightarrow P_{os}$

**Notification<sub>8</sub> / SMS:** Negative = “You are negative to SARS-CoV-2. Stop quarantine confining, continue preventive daily monitoring. Reinsert to cluster- $j$ ”  
 From  $P_{pt} \& P_{ht} \rightarrow P_{os}$

**Initialize SA;**

// **Algorithm 1** (Clinical) based on Symptoms of High Risk //

```

if AA = “yes”; and  $M_s \geq 0$ ; and  $S_s \geq 0$ ; and  $Cd \geq 0$ ; then;
  print Risk → “High”
  print Confinement → “Mandatory confinement and daily monitoring”
  print Surveillance → “Clinical”
  print Testing → “yes”; else;
    do Notification1 [SMARTER-Co →  $P_n$ ]; end do;
end if;
else;
```

// **Algorithm 2** (Clinical) based on Symptoms and Chronic disease //

```

if  $M_s \geq 2$ ; and  $S_s \geq 1$ ; and  $Cd \geq 1$ ; then;
  print Risk  $\rightarrow$  "High"
  print Confinement  $\rightarrow$  "Mandatory confinement and daily monitoring"
  print Surveillance  $\rightarrow$  "Clinical"
  print Testing  $\rightarrow$  "yes"; else;
    do Notification1 [SMARTER-Co  $\rightarrow$   $P_n$ ]; end do;
end if;
else;

```

// **Algorithm 3** (Clinical) based on Symptoms //

```

if  $M_s \geq 2$ ; and  $S_s \geq 1$ ; then;
  print Risk  $\rightarrow$  "Moderate"
  print Confinement  $\rightarrow$  "Preventive confining and daily monitoring"
  print Surveillance  $\rightarrow$  "Clinical"
  print Testing  $\rightarrow$  "no"; else;
    do Notification1 [SMARTER-Co  $\rightarrow$   $P_n$ ]; end do;
end if;
else;

```

// **Algorithm 4** (Clinical-Epidemiological) based on Positive contact and Symptoms //

```

if  $C_{pos} = \text{"yes"};$  and  $M_s > 0$ ; or  $S_s > 0$ ; and  $Cd \geq 0$ ; then;
  print Risk  $\rightarrow$  "High"
  print Confinement  $\rightarrow$  "Mandatory confinement and daily monitoring"
  print Surveillance  $\rightarrow$  "Clinical"
  print Testing  $\rightarrow$  "yes"; else;
    do Notification1 [SMARTER-Co  $\rightarrow$   $P_n$ ]; end do;
end if;
else;

```

// **Algorithm 5** (Epidemiological) based on Positive(s) contact //

```

if  $C_{pos} = \text{"yes"};$  then;
  print Risk  $\rightarrow$  "Moderate"
  print Confinement  $\rightarrow$  "Preventive confining and daily monitoring"
  print Surveillance  $\rightarrow$  "Clinical"
  print Testing  $\rightarrow$  "no"; else;
    do Notification1 [SMARTER-Co  $\rightarrow$   $P_n$ ]; end do;
end if;
else;

```

// **Algorithm 6** (Epidemiological) based on living area/mobility risk //

```

if  $M_s \geq 0$ ; and  $S_s \geq 0$ ; and  $Co \geq 0$ ; and  $Occ = \text{"Student"};$  and  $Tt = \text{"High"};$  and  $Z_{risk} = \text{"Moderate" or "High"};$ 
then;
  print Risk  $\rightarrow$  "Low"
  print Confinement  $\rightarrow$  "No required but daily monitoring suggested"
  print Surveillance  $\rightarrow$  "Ambulatory"; else;
if  $Ws = \text{"yes"};$  then;
  print Testing  $\rightarrow$  "yes"; else;
    do Notification1 [SMARTER-Co  $\rightarrow$   $P_n$ ]; end do;
end if;
else;

```

// **Algorithm 7** (Epidemiological) based on Occupational Cluster-i at Risk //

```

    if  $M_s \geq 0$ ; and  $S_s \geq 0$ ; and  $Co \geq 0$ ; and  $Occ = \text{"Worker"}$ ; and  $Ag \leq 37$ ; and  $Sc_{risk} = \text{"Moderate"}$ 
    or  $\text{"High"}$ ; and  $Z_{risk} = \text{"Moderate"}$  or  $\text{"High"}$ ; then;
    print Risk  $\rightarrow$  "Low"
    print Confinement  $\rightarrow$  "No required but daily monitoring suggested"
    print Surveillance  $\rightarrow$  "Ambulatory"; else;
    if  $Ws = \text{"yes"}$ ; then;
    print Testing  $\rightarrow$  "yes"; else;
    do Notification1 [SMARTER-Co  $\rightarrow P_n$ ]; end do;
end if;
else;

```

// **Algorithm 8** (Epidemiological) based on Occupational Subcluster-i at Risk //

```

    if  $Occ = \text{"Teacher"}$ ; and  $S_{clus} = \text{"Yes"}$ ; and  $Cur = \text{"Yes"}$ ; then;
    print Risk  $\rightarrow$  "Low"
    print Confinement  $\rightarrow$  "No required but daily monitoring suggested"
    print Surveillance  $\rightarrow$  "Ambulatory"; else;
    if  $Ws = \text{"yes"}$ ; then;
    print Testing  $\rightarrow$  "yes"; else;
    do Notification1 [SMARTER-Co  $\rightarrow P_n$ ]; end do;
end if;
else;

```

// **Algorithm 9** Undefined risk //

```

    if  $M_s = 0$ ; and  $S_s = 0$ ; and  $Co = 0$ ;  $C_{pos} = \text{"yes"}$ ; and  $Sc_{risk} = \text{"Low"}$ ; and  $Z_{risk} = \text{"Low"}$ ; and  $S_{clus} = \text{"No"}$ ; and
     $Tt = \text{"Low"}$ ; then;
    print Risk  $\rightarrow$  "Undefined"
    print Confinement  $\rightarrow$  "No required but daily monitoring suggested"
    print Surveillance  $\rightarrow$  "Ambulatory"
    print Testing  $\rightarrow$  "no"; else;
    do Notification1 [SMARTER-Co  $\rightarrow P_n$ ];
end if;
else;
    while  $t = \text{"Continuous"}$ ;
    repeat  $DSm$ ;
    until  $t = \text{"End period"}$ ;
end SA;
else;

```

// **Notification of decision-making algorithms through WWW-Platform //**

```

    if  $Re = \text{"ready"}$ ; then;
    do Notification2 [SMS, Dashboard / WWW-Platform  $\rightarrow \{P_{pt} \& P_{ht}\}$ ];
    end do;
    do Notification3.1 [SMS / WWW-Platform  $\{P_{pt} \rightarrow P_n\}$ ]; end do;
    if  $qPCR = \text{"Positive"}$ ; then;
    print Risk  $\rightarrow$  "High"
    print Confinement  $\rightarrow$  "Quarantine confining and daily monitoring mandatory";
    print Surveillance  $\rightarrow$  "Clinical"; else;
    do Notification3.2 [SMS / WWW-Platform  $\{P_{pt} \rightarrow P_n\}$ ]; end do;
    do Notification4 [SMS / WWW-Platform  $\{P_{ht} \rightarrow M\}$ ]; end do;
    do Notification5 [SMS, @mail, WSP  $\{P_{os} \rightarrow Am_{ck} (SM)\}$ ]; end do;
end if;
else;
    while  $qPCR = \text{"Positive"}$ ;
    repeat print Risk  $\rightarrow$  "High"

```

```

                                print Confinement → "Quarantine confining and daily
                                monitoring mandatory"; else;
                                do Notification6 [SMS / WWW-Platform { $P_{pt}$  &  $P_{ht}$  →  $P_{os}$  }];
                                do Notification7 [SMS / WWW-Platform { $P_{pt}$  &  $P_{ht}$  →  $P_{os}$  }];
                                end do;
                                until qPCR = "Negative";
                                else:
                                if qPCR = "Negative"; then;
                                do Notification8 [SMS / WWW-Platform { $P_{pt}$  &  $P_{ht}$  →  $P_{os}$  }];
                                end do;
                                else;
                                while t = "Continuous";
                                repeat DSm;
                                until t = "End period";
                                end;

```
